# Supplementary material for: Breakthrough Mucormycosis Developing on Mucorales-Active Antifungals Portrays a Poor Prognosis in Patients with Hematologic Cancer
Source: MDPI journal article supplement (doi:10.3390/jof7030217), 2021-03-17
Supplement: s1 [file s1]

## Article

# Breakthrough Mucormycosis Developing on Mucorales-Active Antifungals Portrays a Poor Prognosis in Patients with Hematologic Cancer

## Supplementary Materials

**Table S1.** Cox regression model of independent predictors of 84-day mortality in patients with breakthrough mucormycosis.

| <b>(A) Mortality within 84 days of treatment initiation</b> |                     |                                |                |
|-------------------------------------------------------------|---------------------|--------------------------------|----------------|
| <b>Predictors</b>                                           | <b>Hazard ratio</b> | <b>95% Confidence Interval</b> | <b>p-value</b> |
| Cancer status                                               |                     |                                | 0.048          |
| Active                                                      | 2.50                | 1.01 to 6.21                   |                |
| Remission                                                   | Reference           |                                |                |
| ICU at diagnosis                                            | 2.98                | 1.37 to 6.47                   | 0.006          |
| APACHE II score at diagnosis (every 1-unit increase)        | 1.18                | 1.10 to 1.27                   | < .0001        |
| Neutropenia status                                          |                     |                                | < .0001        |
| No neutropenia at diagnosis                                 | Reference           |                                |                |
| Neutropenia, recovered                                      | 0.71                | 0.35 to 1.44                   |                |
| Neutropenia, not recovered                                  | 3.44                | 1.59 to 7.43                   |                |
| Antifungal prophylaxis                                      |                     |                                | < .001         |
| Mucorales-active                                            | 3.29                | 1.76 to 6.15                   |                |
| Other mold-active                                           | Reference           |                                |                |
| Treatment                                                   |                     |                                | < .001         |
| Amphotericin B + caspofungin                                | 3.22                | 1.68 to 6.17                   |                |
| Others                                                      | Reference           |                                |                |
| <b>(B) Mortality within 84 days of symptom onset</b>        |                     |                                |                |
| <b>Predictors</b>                                           | <b>Hazard ratio</b> | <b>95% Confidence Interval</b> | <b>p-value</b> |
| Cancer status                                               |                     |                                | 0.039          |
| Active                                                      | 2.81                | 1.06 to 7.48                   |                |
| Remission                                                   | Reference           |                                |                |
| ICU at diagnosis                                            | 4.80                | 2.32 to 9.89                   | < .0001        |
| APACHE II score at diagnosis (every 1-unit increase)        | 1.16                | 1.09 to 1.23                   | < .0001        |
| Neutropenia status                                          |                     |                                | < .0001        |
| No neutropenia at diagnosis                                 | Reference           |                                |                |
| Neutropenia, recovered                                      | 0.82                | 0.40 to 1.70                   |                |
| Neutropenia, not recovered                                  | 5.10                | 2.28 to 11.38                  |                |
| Antifungal prophylaxis                                      |                     |                                | < .0001        |
| Mucorales-active                                            | 3.73                | 1.97 to 7.07                   |                |
| Other mold-active                                           | Reference           |                                |                |
| Treatment*                                                  |                     |                                | < .001         |
| Amphotericin B + caspofungin                                | 3.57                | 1.84 to 6.91                   |                |
| Others                                                      | Reference           |                                |                |

\* Treatment was a time-dependent variable in the analysis. Abbreviations: ICU = intensive care unit.

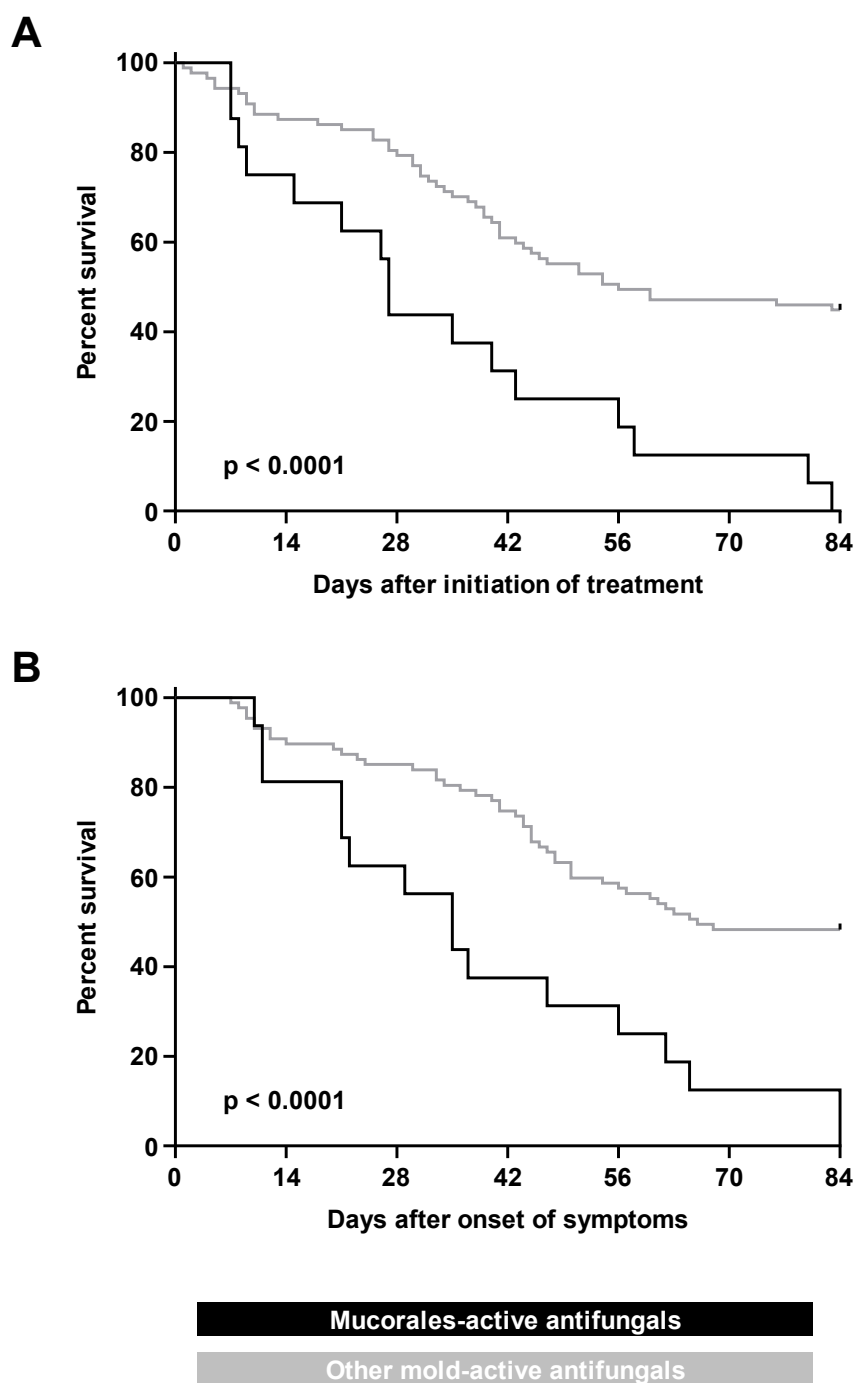

**Figure S1.** Kaplan Meier curves of progression to 84-day mortality in patients with hematologic malignancy and recipients of hematopoietic cell transplants with breakthrough mucormycosis on Mucorales-active versus other mold-active antifungals as measured from (A) initiation of treatment and (B) onset of symptoms.

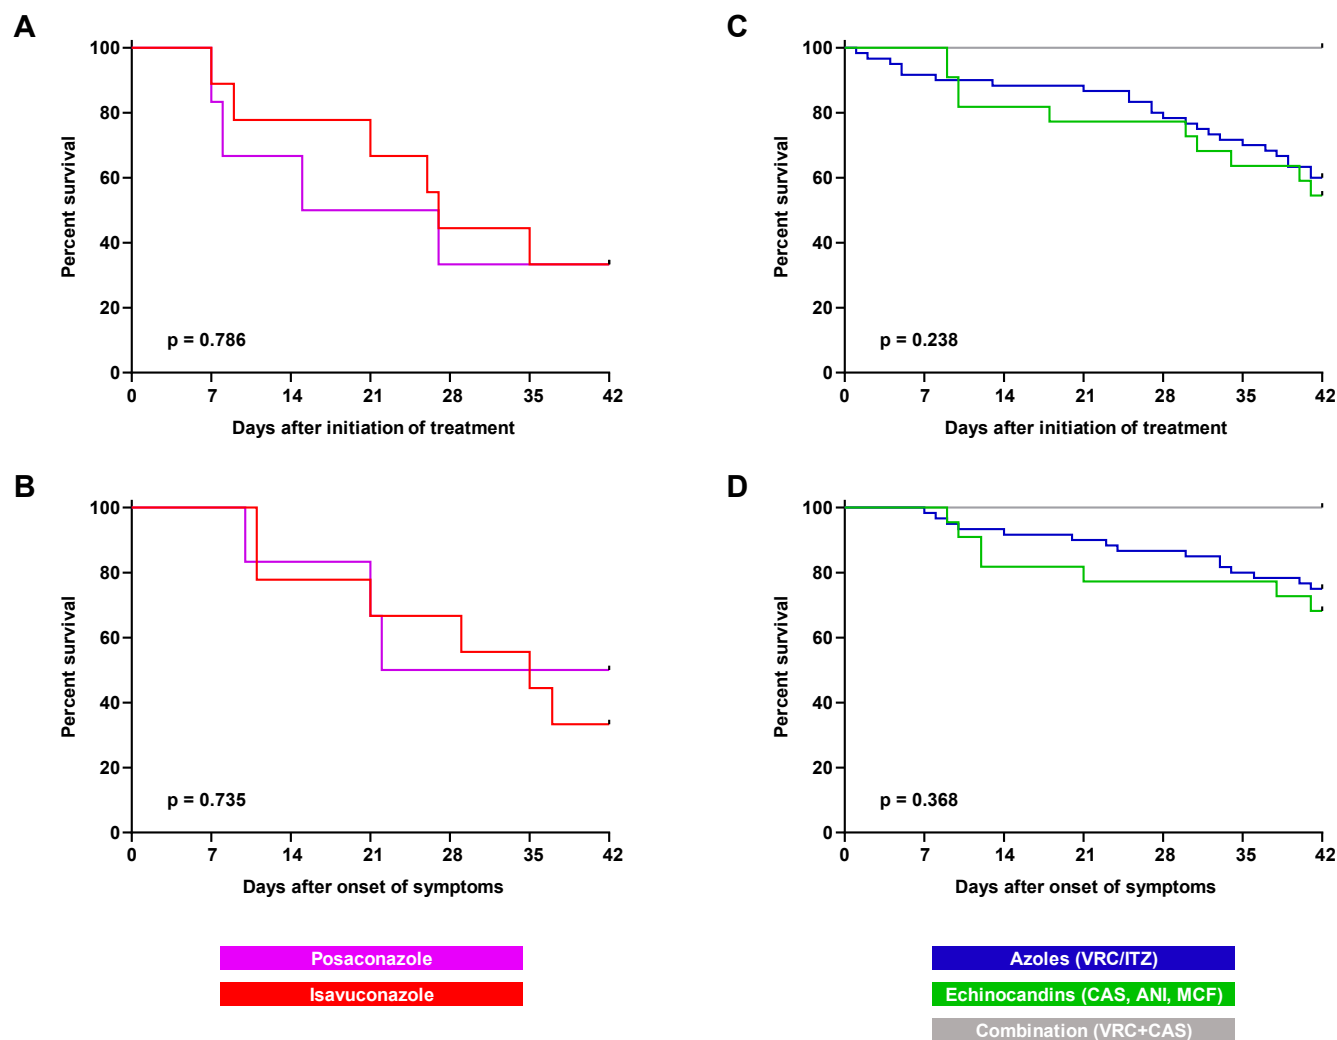

**Figure S2.** Breakdown of survival outcomes of BT-MCR by individual (groups of) antifungal drugs. Kaplan Meier curves show progression to 42-day mortality in patients with BT-MCR on Mucorales-active antifungals as measured from (A) initiation of treatment and (B) onset of symptoms; and other mold-active antifungals from (C) initiation of treatment and (D) onset of symptoms. The single patient with BT-MCR to amphotericin B has not been included in panels (A) and (B).

Abbreviations: BT-MCR = breakthrough mucormycosis, ANI = anidulafungin, CAS = caspofungin, ITZ = itraconazole, MCF = micafungin, VRC = voriconazole.

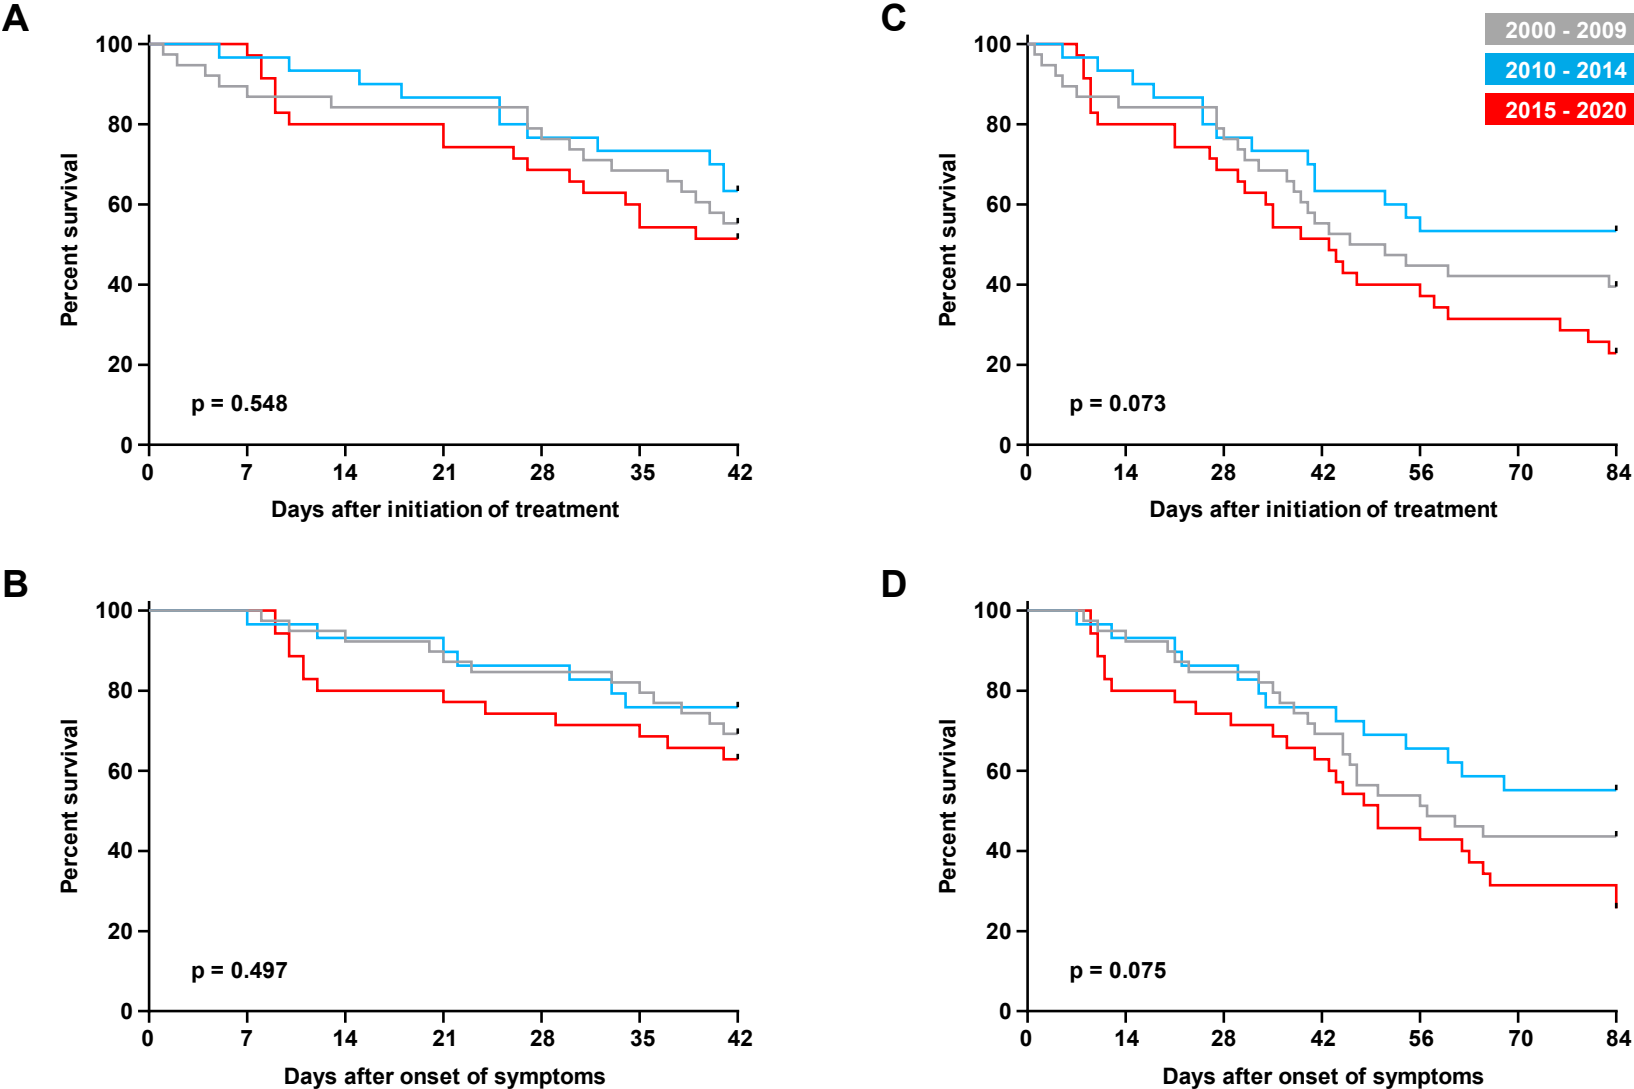

**Figure S3.** Kaplan Meier curves of progression to all-cause 42-day mortality of breakthrough mucormycosis from (A) initiation of treatment and (B) onset of symptoms, and 84-day mortality from (c) initiation of treatment and (d) onset of symptoms, depending on the year of diagnosis.
